# Supplementary material
Source: PubMed Central journal article supplement (PMC3294474)
Supplement: supp_78.5.1454_AEM-AEM07227-11-s01.pdf [file supp_78.5.1454_AEM-AEM07227-11-s01.pdf]

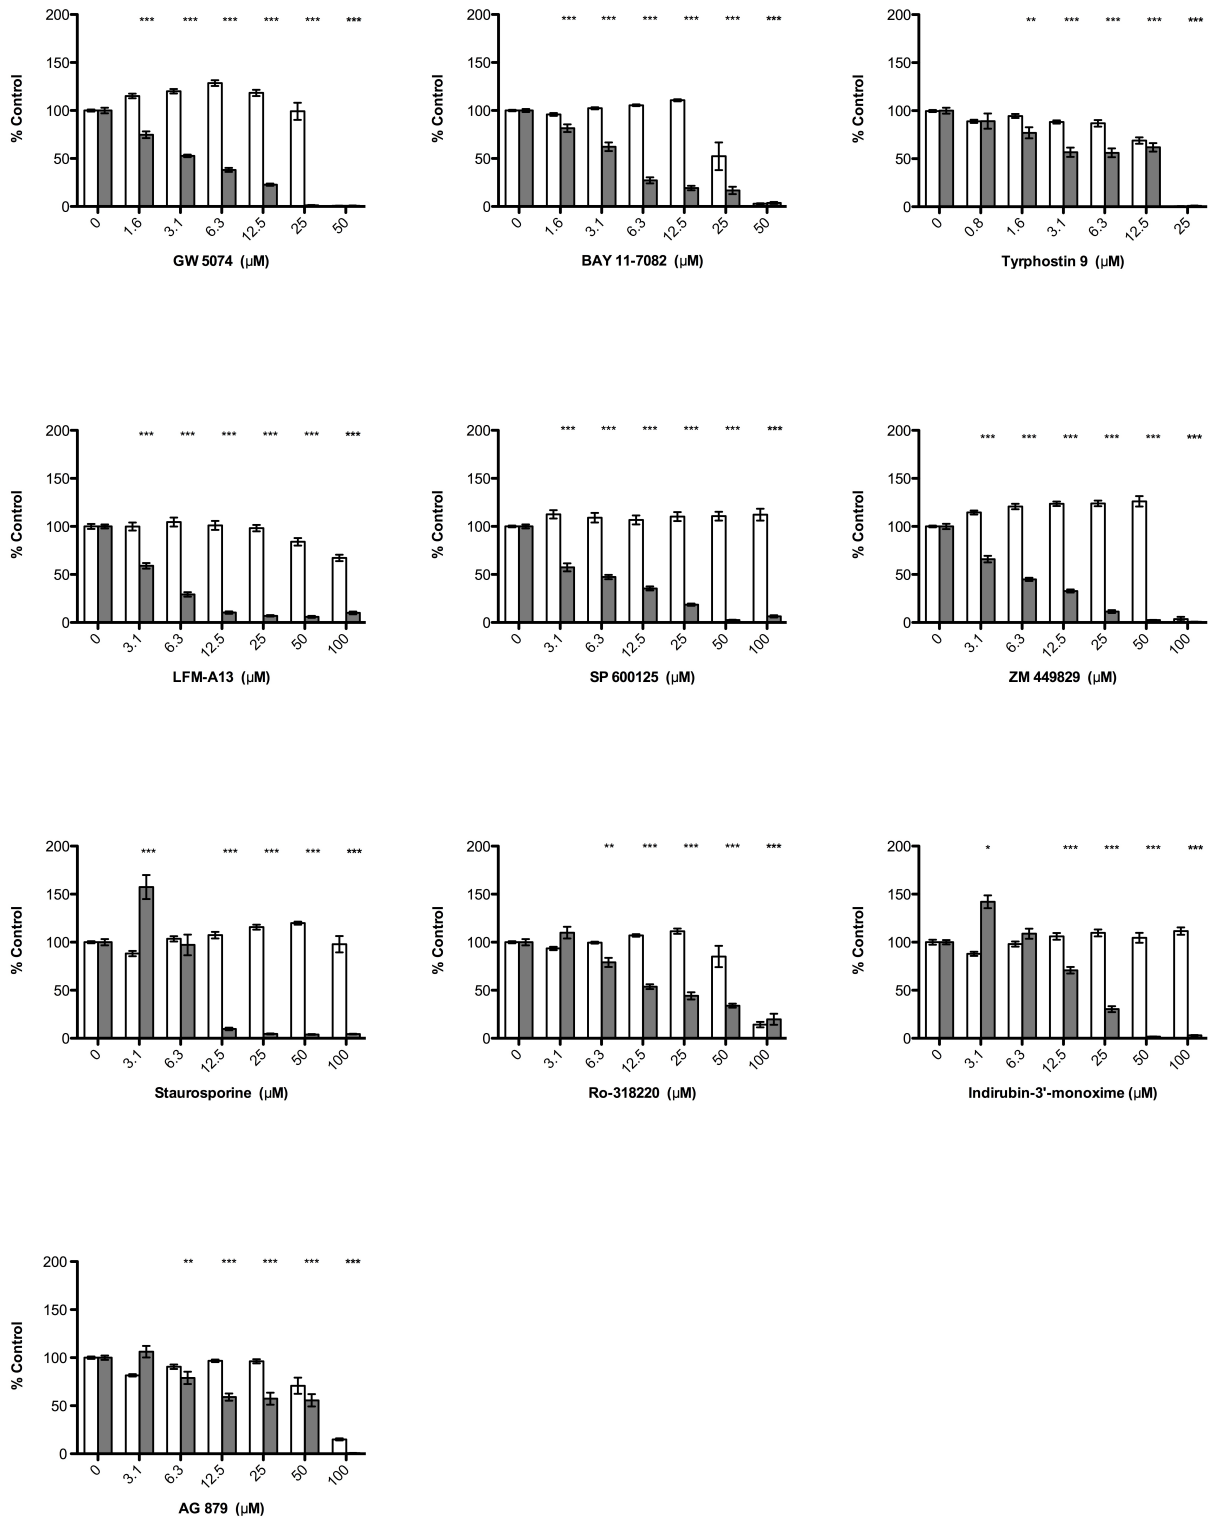

**Figure S1. The effects of planktonic growth inhibitors and biofilm inhibitors on biofilm formation.** *L. monocytogenes* biofilms were grown on polystyrene pegs and quantified using crystal violet staining. Planktonic growth at day 3 (white bars) and biofilm formation (grey bars), expressed as a percentage of control samples, n=3. \* p < 0.01; \*\* p < 0.001; \*\*\* p < 0.0001

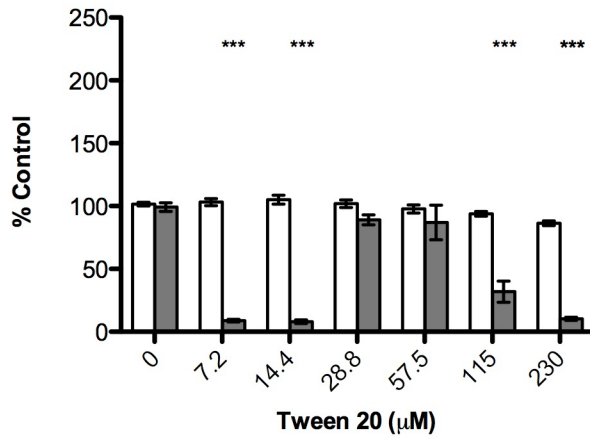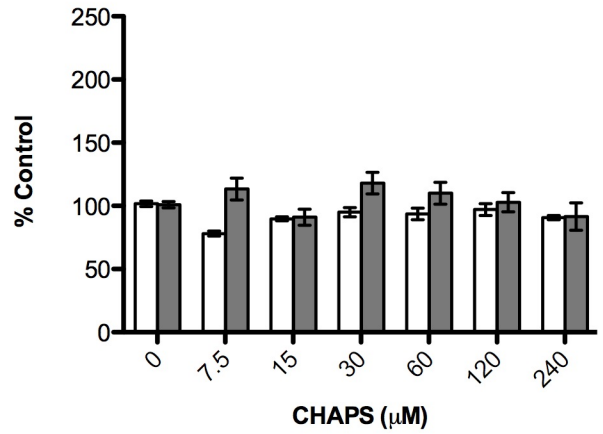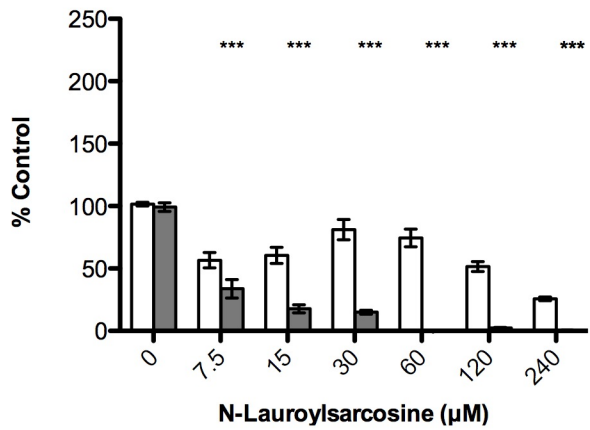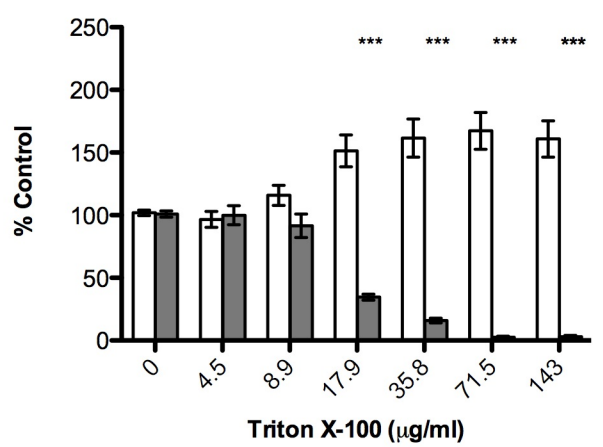

**Figure S2. The effects of various detergents on biofilm formation.** *L. monocytogenes* biofilms were grown on polystyrene pegs and quantified using crystal violet staining. Planktonic growth at day 3 (white bars) and biofilm formation (grey bars), expressed as a percentage of control samples, n=4. \* p<0.01; \*\* p<0.001; \*\*\* p<0.0001
